# Supplementary material for: Restless legs syndrome: Over 50 years of European contribution
Source: PubMed Central journal article supplement — J Sleep Res. 2022 Jul 9;31(4):e13632. doi: 10.1111/jsr.13632 (PMC9542244; doi:10.1111/jsr.13632), 2022-07-09
Supplement: JSR-31-e13632-s001.pdf [file JSR-31-e13632-s001.pdf]

SAGE PUBLICATIONS LICENSE  
TERMS AND CONDITIONS

Apr 06, 2022

---

---

This Agreement between Dr. Samson Khachatryan ("You") and SAGE Publications ("SAGE Publications") consists of your license details and the terms and conditions provided by SAGE Publications and Copyright Clearance Center.

**All payments must be made in full to CCC. For payment instructions, please see information listed at the bottom of this form.**

License Number 5283240672477

License date Apr 06, 2022

Licensed Content Publisher SAGE Publications

Licensed Content Publication The Neuroscientist: Reviews at the Interface of Basic and Clinical Neurosciences

Licensed Content Title New Insights into the Neurobiology of Restless Legs Syndrome

Licensed Content Author Sergi Ferré, Diego García-Borreguero, Richard P. Allen, et al

Licensed Content Date Apr 1, 2019

Licensed Content Volume 25

Licensed Content Issue 2

Licensed Content Pages 13

Type of Use Journal

Requestor type Non-commercial

Format Print and electronic

Portion Figure/table

Number of figures/tables 1

Will you be translating? No, only English

Circulation 1000

Title of new article Restless Legs Syndrome: Over 50 Years of European Contribution

Lead author Samson Khachatryan MD PhD

Title of targeted journal Journal of Sleep Research

Publisher Wiley

Expected publication date Sep 2022

Portions Figure 6

Dr. Samson Khachatryan  
Griboyedov 19-34

Requestor Location

Yerevan, 0051  
Armenia  
Attn: Dr. Samson Khachatryan

Billing Type Credit Card

Credit card info American Express ending in 4944

Credit card expiration 06/2022

Total 51.39 EUR

Terms and Conditions

### **SAGE Terms and Conditions for Permissions Administered Through RightsLink**

You, the Requestor, are requesting to use the material specified in the permission request (the "Work"). Your agreement to the terms and conditions herein and completion of a permission request constitutes a Permission Request. You are in no way required to use the Work; however, should you decide not to use the Work after you complete this request, you agree to cancel your order through this website. Under the above conditions, and the following terms and conditions, permission to use Work ("Permission") is granted solely to you:

1. SAGE reserves the right to revoke any Permission, at SAGE's sole discretion, within two (2) business days of the request.
2. The number of copies ("Copies") for print use is defined as the total number of copies made for distribution or for repurposing, and the number of copies ("Copies") for electronic use is defined as the total number of viewers of the Work, recipients of copies of the Work, and individuals or entities who may have access to the Work. The Copies must not exceed the Copies as stated in the Permission Request.

3. Requests to post a full article on a website, internet, intranet, or any publicly accessible site must be submitted to the Publisher through the SAGE Permissions Portal (<https://jira.sagepub.com/servicedesk/customer/portal/9>).
4. Permission is granted only for the type of use specified in the Permission Request. If any information pertaining to your Permission Request changes, you must cancel this request and resubmit a new request with the correct and current permission request information. SAGE may exercise its right to revoke Permission, if SAGE finds, in SAGE's sole opinion, that the context in which you have used or repurposed the Work is considered libelous, in violation of any right of privacy, or otherwise unlawful; infringement or in violation of any copyright or other proprietary right of others; or can be construed to possibly cause harm or injury. You agree that use of Work will be professional, in the context of fact-based and generally acceptable professional practices.
5. Permission does not include the use within Custom Publishing Programs, and all use within such programs is explicitly prohibited.
6. Permission does not include use of the material within Massive Open Online Courses (MOOC's). For permission to include material in a MOOC, please contact SAGE directly through the SAGE Permissions Portal (<https://jira.sagepub.com/servicedesk/customer/portal/9>).
7. If your Permission Request includes the right to translate the Work, you agree that the translation of the material shall be made faithfully and accurately, and that abbreviations and/or alterations in the text and/or title of the Work shall be made only with SAGE's prior the written consent. Requestor shall not own or acquire any copyright or other proprietary rights in the Work or any other material furnished by SAGE, including without limitation translations or transcriptions thereof, all of which rights shall be owned by and/or are hereby assigned to SAGE. Requestor shall indemnify SAGE against any and all claims, including without limitation attorneys' fees and legal costs, that concern or relate to (a) inaccurate translation or transcription of the Work, (b) infringement claims arising out of the inclusion of material not furnished by SAGE or (c) infringement or other claims asserted by anyone retained by Requestor to translate the Work. Requestor agrees that the name of the Author (s), Copyright Holder, and Publisher shall appear in due prominence on the title page of every copy of the translation and in all advertisements for the translation, and that the translation shall include: (1) the Work's original copyright notice and original American title, both in English, and (2) notice in granted translated language in identifying the SAGE Publications as the original publisher and stating the translation is published by arrangement with SAGE. The rights licensed to Requestor are not transferrable. The translated article reprint must include the following disclaimer in English and in the language of the reprint: "While every effort has been made to ensure that the contents of this publication are factually correct, neither the authors nor the publisher accepts, and they hereby expressly exclude to the fullest extent permissible under applicable law, any and all liability arising from the contents published in this Article, including, without limitation, from any errors, omissions, inaccuracies in original or following translation, or for any consequences arising therefrom. Nothing in this notice shall exclude liability which may not be excluded by law. Approved product information should be reviewed before prescribing any subject medications."
8. Permission is granted for prospective use only, and does not apply to any use that has occurred prior to the date of the Permission Request.
9. Permission does not apply to any material (reprints, illustrations, figures, tables, etc.) not controlled by SAGE. Requests for permission to re-use third-party material should be submitted to the original copyright holder, as indicated in the credit line for the materials.
10. Full acknowledgment of your source must appear in every copy of your work as follows:
  - o Author(s), Journal Title (Journal Volume Number and Issue Number)
  - o pp. xx-xx, copyright © YEAR by (Copyright Holder)
  - o Reprinted by Permission of SAGE Publications
11. Unless specified in the request or by prior arrangement with SAGE, payment is due from you within sixty (60) days after the completion of Permission.
12. It is assumed that the Requester is using the selection in question, and is subject to billing and collections procedures, unless otherwise noted.
13. Permission Requests for reuse of text excerpts shall not exceed 50% of the article's content.
14. No more than 20% of any one SAGE journal issue may be reused at one time.

**Other Terms and Conditions:**

v4.04

Questions? [customercare@copyright.com](mailto:customercare@copyright.com) or +1-855-239-3415 (toll free in the US) or +1-978-646-2777.

---

---
